# Supplementary material
Source: PubMed Central journal article supplement (PMC2814500)
Supplement: tpc.109.069211_1.pdf [file tpc.109.069211_1.pdf]

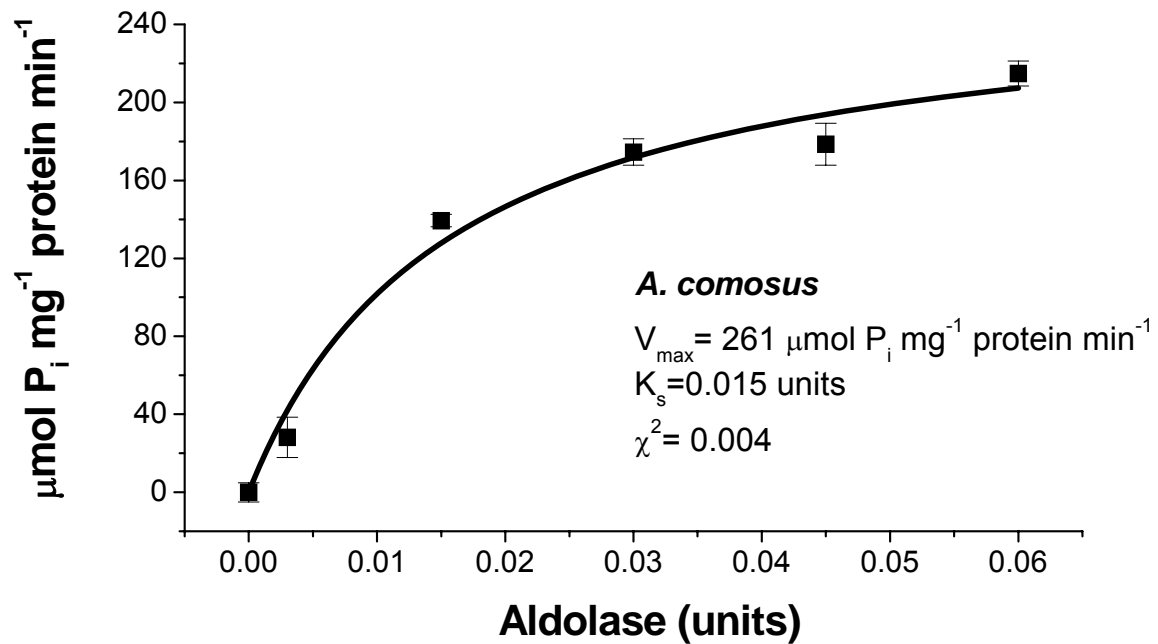

**Supplemental Figure 1.** Aldolase stimulates V-ATPase hydrolytic activity in *Ananas comosus*

V-ATPase hydrolytic activity (bafilomycin insensitive, azide and vanadate sensitive) was estimated by spectrophotometric measurement of inorganic phosphate release as described in Methods. Activity was measured in tonoplast vesicles (15 ug protein) isolated from *Ananas comosus* (pineapple) over a range of aldolase concentrations. Data represent means  $\pm$  SE of three replicate experiments. Each replicate experiment was performed using independent membrane preparations. The solid lines show the fit of the kinetic data with the Michaelis-Menten equation. The  $\chi^2$  value indicates the goodness-of-fit and confirmed that the data fitted the equation at a probability level of at least  $P < 0.01$ ,

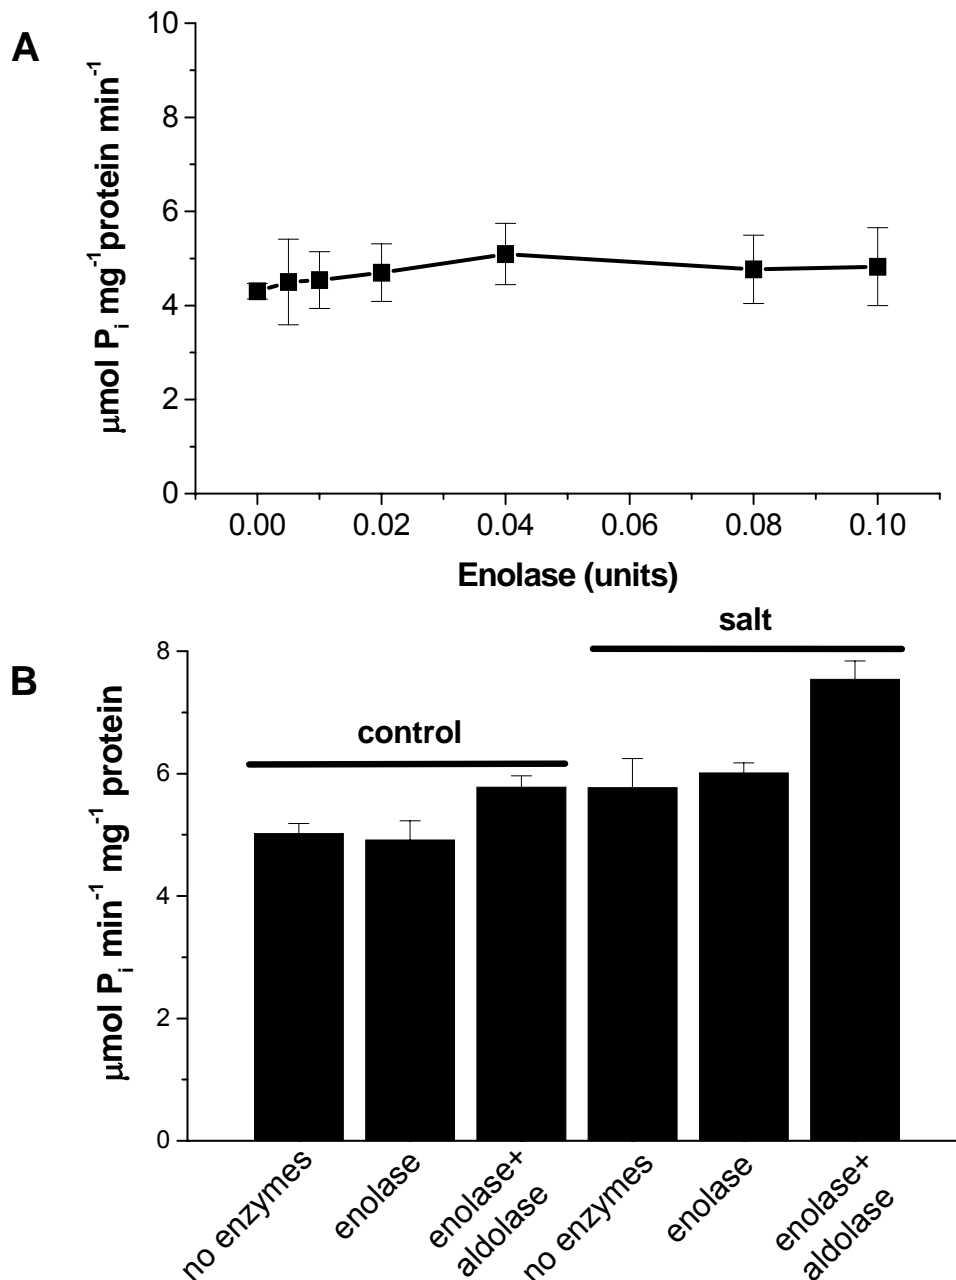

**Supplemental Figure 2:** Yeast enolase does not stimulate V-ATPase hydrolytic activity *in vitro*.

(A) V-ATPase hydrolytic activity (bafilomycin sensitive, azide and vanadate insensitive) was estimated by spectrophotometric measurement of inorganic phosphate release as described in Methods. Activity was measured in tonoplast vesicles (15  $\mu\text{g}$  protein) isolated from salt-treated *M. crystallinum* over a range of enolase concentrations.

(B) V-ATPase activity was measured in the absence or presence of 0.03 units aldolase and 0.04 units enolase in tonoplast isolated from *M. crystallinum* plants grown under control conditions or in the presence of 200 mM NaCl. Data represent means  $\pm$  SE of three replicate experiments. Each replicate experiment was performed using independent membrane preparations.

**Supplemental Table 1.** Peptide precursor mass and mass accuracy of identified peptides.

| Spot # | # Identified Peptides <sup>a</sup> | MH <sup>+</sup> <sup>b</sup> | DeltaM <sup>c</sup> |
|--------|------------------------------------|------------------------------|---------------------|
| 131    | 3                                  | 1573.84318                   | -0.12645            |
|        |                                    | 1323.76308                   | 0.03572             |
|        |                                    | 1790.92830                   | -0.20357            |
| 132    | 2                                  | 1573.84318                   | -0.05894            |
|        |                                    | 1510.84753                   | -0.14954            |
| 225    | 2                                  | 973.52005                    | -0.05180            |
|        |                                    | 1076.50474                   | 0.00088             |
| 241    | 5                                  | 1259.73580                   | 0.04950             |
|        |                                    | 1448.71283                   | -0.02892            |
|        |                                    | 1346.73144                   | -0.13037            |
|        |                                    | 2216.11533                   | 0.06802             |
|        |                                    | 1766.89594                   | -0.10919            |
| 318    | 2                                  | 1596.91080                   | -0.03954            |
|        |                                    | 1715.93266                   | -0.02662            |
| 414    | 3                                  | 1563.80131                   | -0.14270            |
|        |                                    | 1088.57686                   | 0.03899             |
|        |                                    | 2501.18982                   | 0.00376             |

<sup>a</sup>Number of matched peptides from MS/MS. Proteins were identified by 2 or more unique peptides.

<sup>b</sup>Peptide precursor mass

<sup>c</sup>Mass accuracy

**Supplemental Table 2.** Gel Scanning Parameters used for the Typhoon scanner.

| <b>CyDye</b> | <b>Emission filter (nm)<br/>/Band Pass</b> | <b>Laser<br/>(nm)</b> | <b>Resolution<br/>(<math>\mu\text{m}</math>)</b> | <b>PMT<sup>a</sup><br/>(V)</b> |
|--------------|--------------------------------------------|-----------------------|--------------------------------------------------|--------------------------------|
| Cy2          | 520/40                                     | Blue 488              | 100                                              | 600                            |
| Cy 3         | 580/30                                     | Green 532             | 100                                              | 600                            |
| Cy 5         | 670/30                                     | Red 633               | 100                                              | 600                            |

<sup>a</sup>Photomultiplier tube voltage
